# Supplementary material
Source: PubMed Central journal article supplement (PMC8894137)

ED Fig. 11f

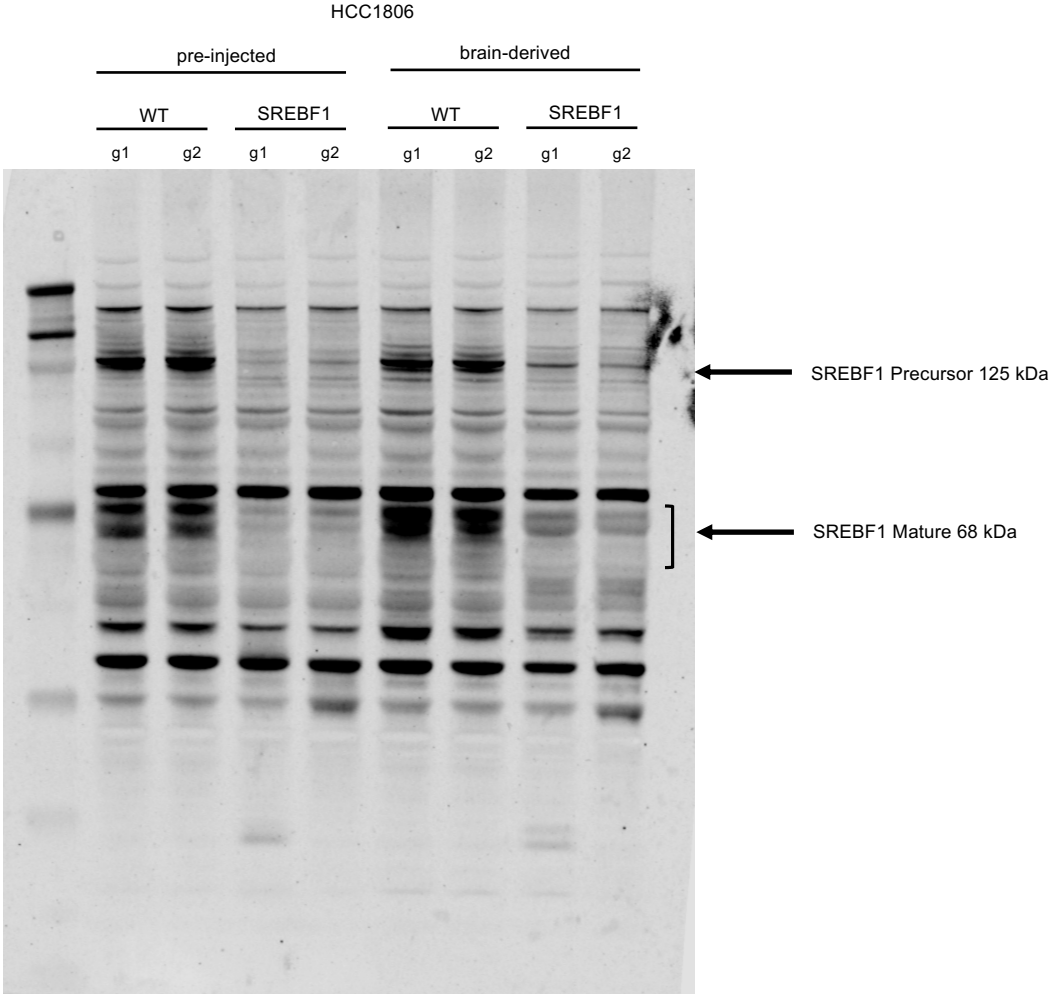

ED Fig. 11f

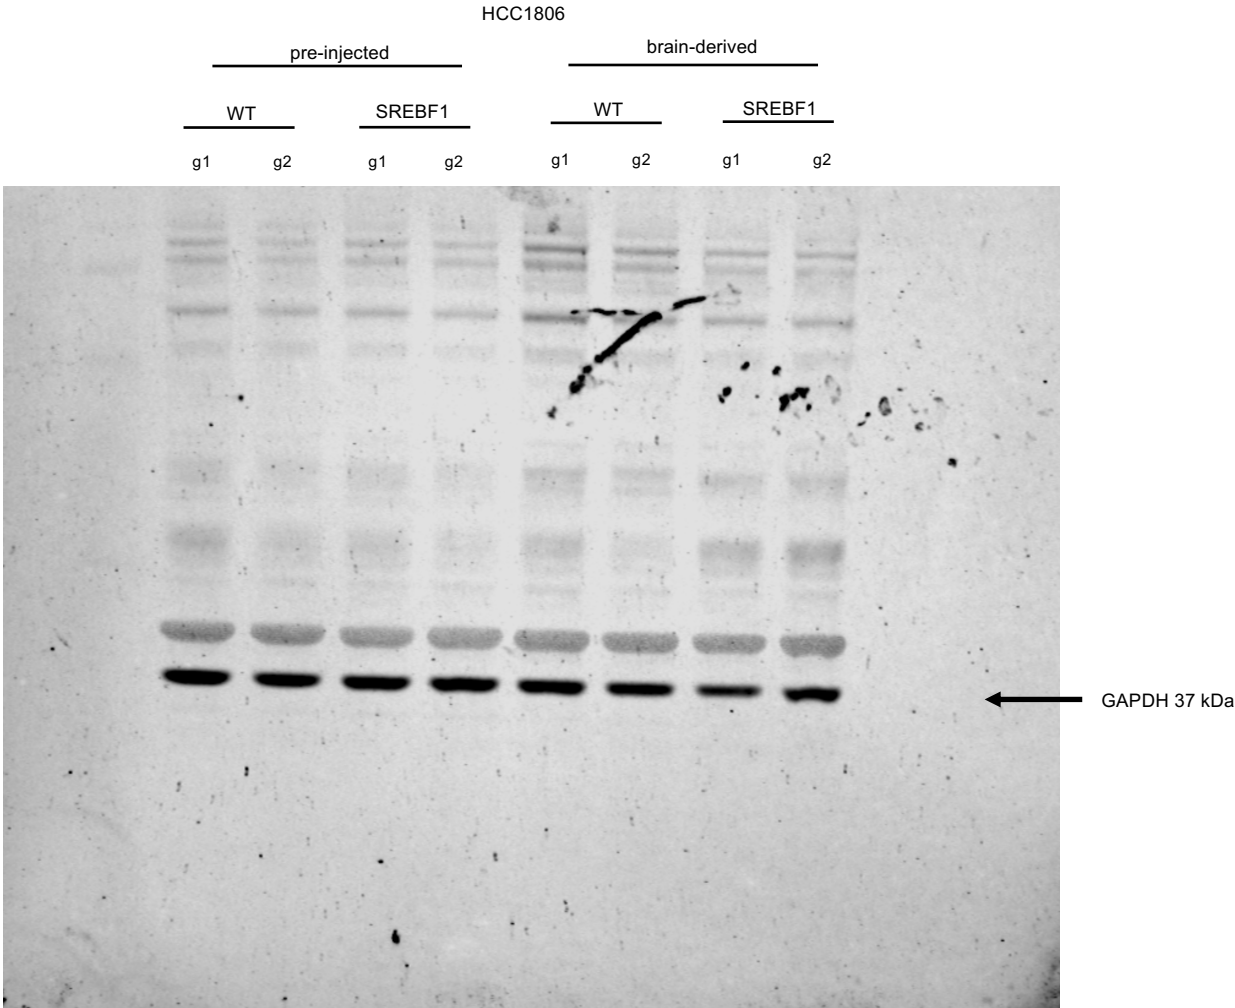

ED Fig. 11f

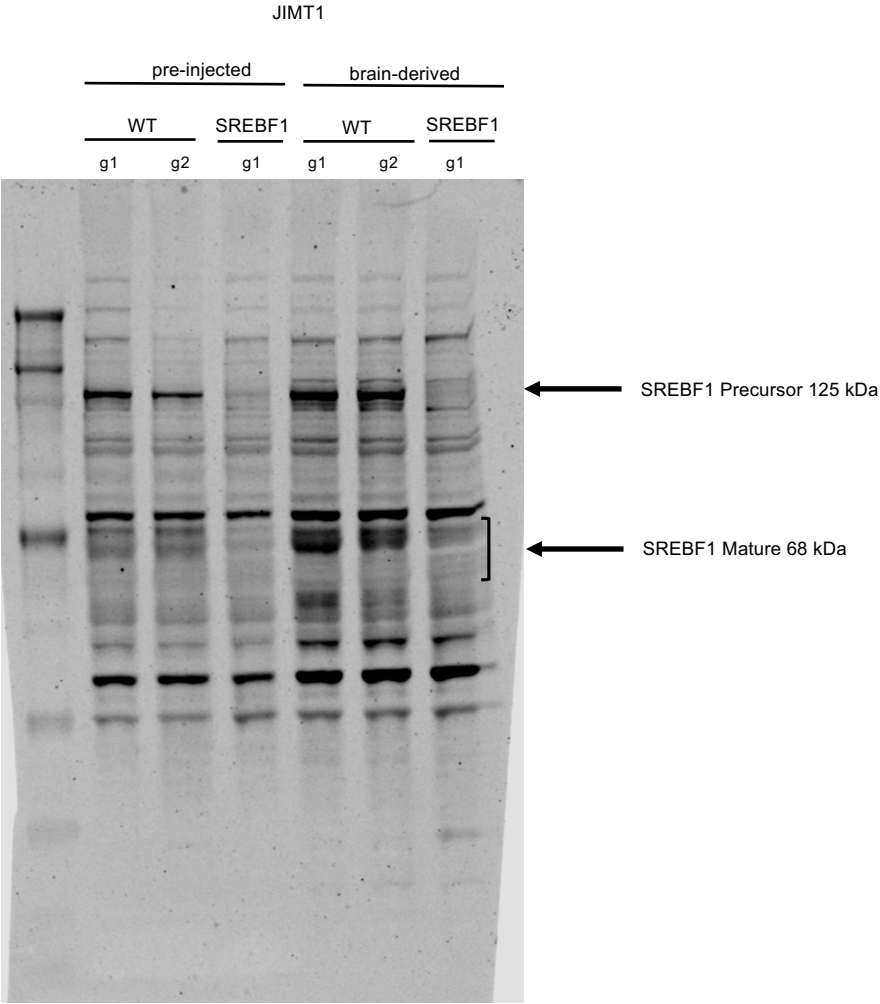

ED Fig. 11f

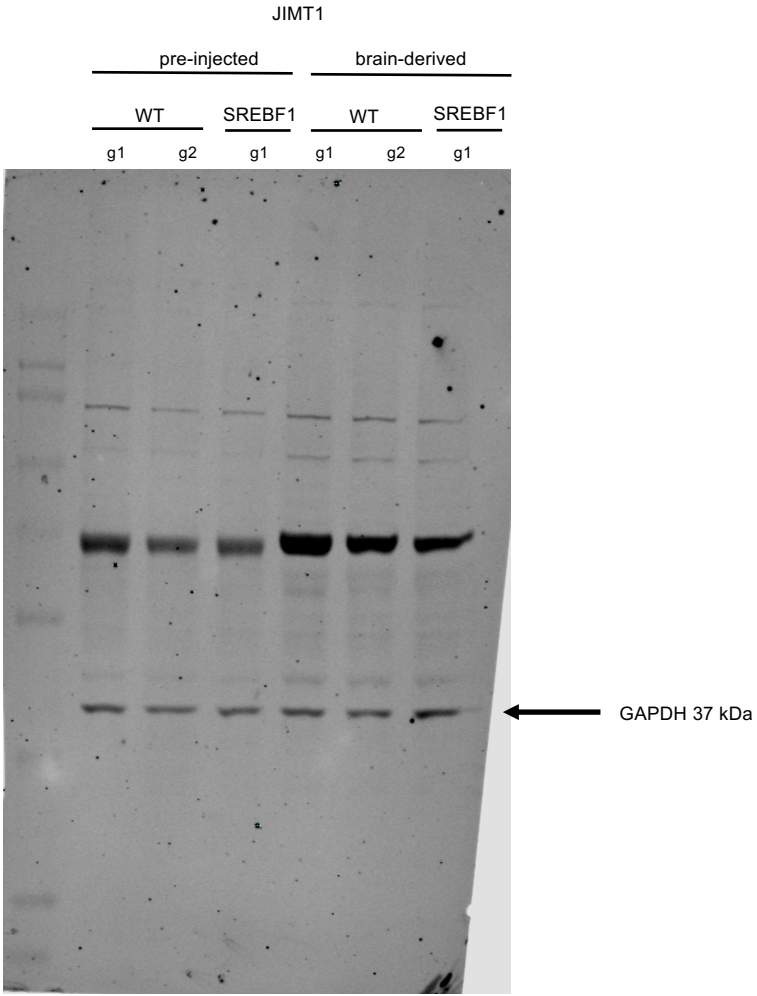

ED Fig. 11h

HCC1806

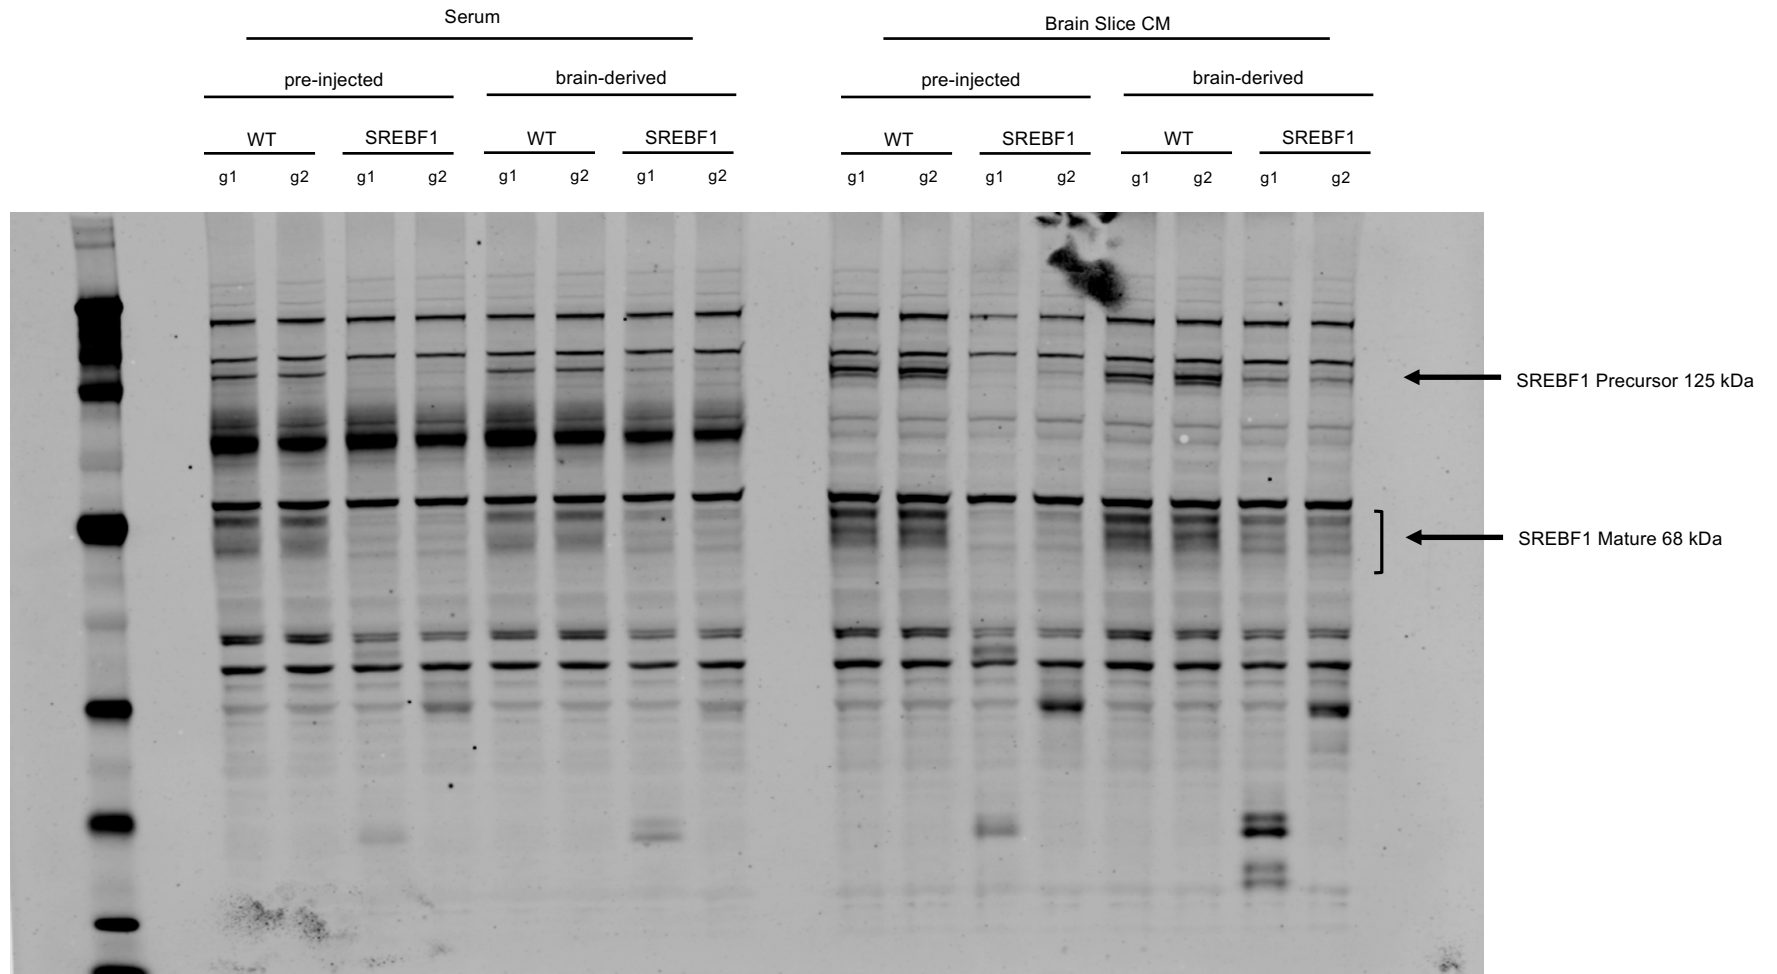













ED Fig. 11h

HCC1806

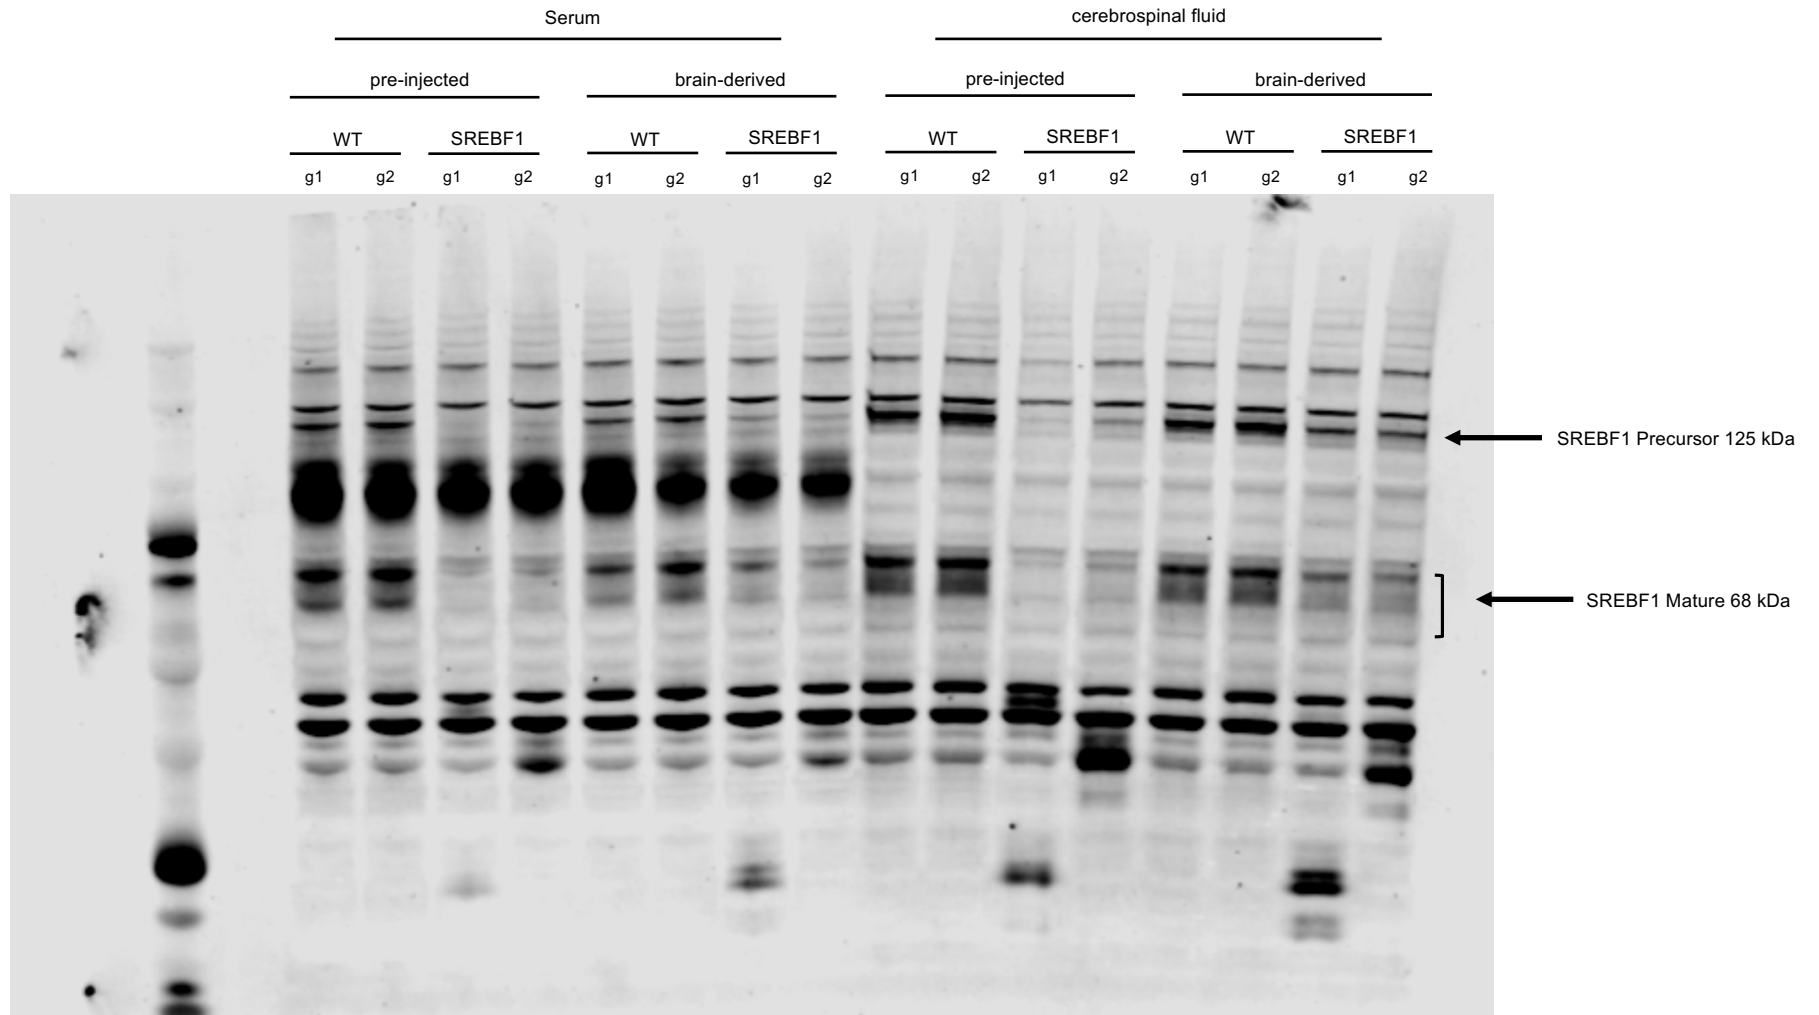



ED Fig. 11h

HCC1806

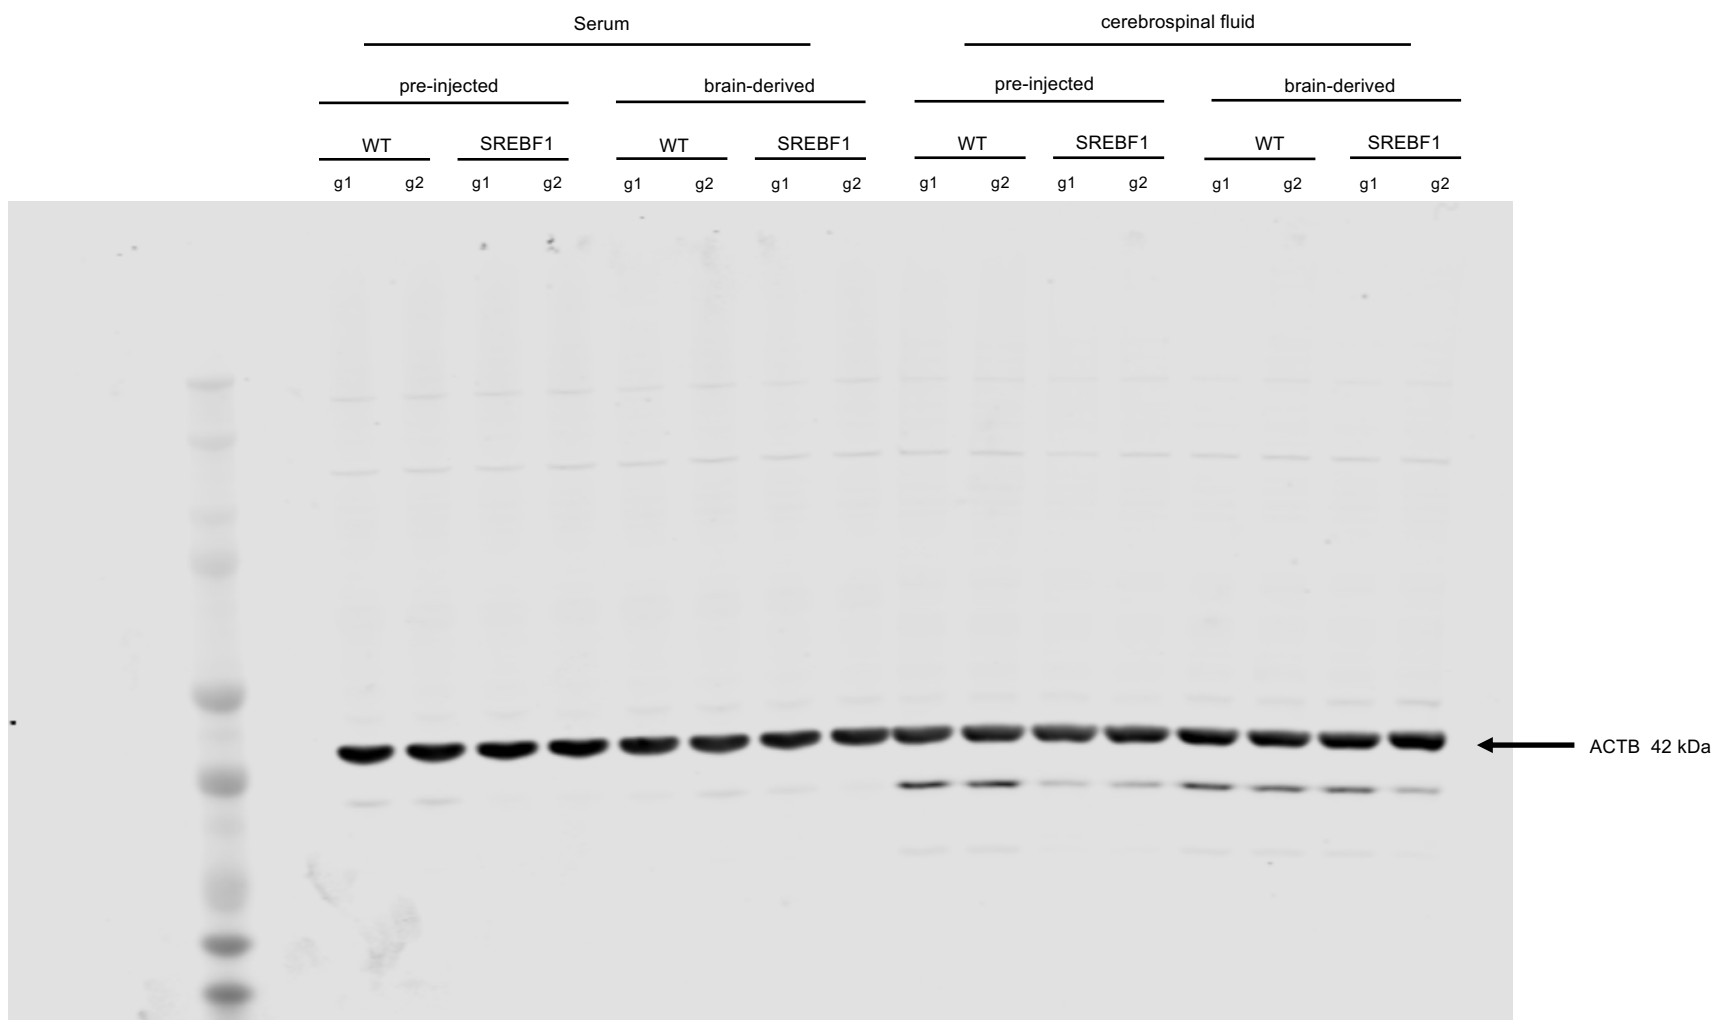

Supplement: 41586_2020_2969_MOESM3_ESM.pdf [file 41586_2020_2969_MOESM3_ESM.pdf]
